# Supplementary material for: Cardiorespiratory Fitness in Adolescence and Risk of Type 2 Diabetes in Late Adulthood: A Nationwide Sibling-Controlled Cohort Study
Source: bioRxiv or medRxiv preprint supplement (doi:10.1101/2024.11.26.24318038), 2024-11-28
Supplement: Supplementary file [file media-1.pdf]

## Supplemental Material

### Cardiorespiratory Fitness in Adolescence and Risk of Type 2 Diabetes in Late Adulthood: A Nationwide Sibling-Controlled Cohort Study

#### Authors:

Marcel Ballin, PhD<sup>1,2</sup> (ORCID 0000-0002-9638-7208), Viktor H. Ahlqvist, PhD<sup>1,3,4</sup> (ORCID 0000-0003-1383-3194), Daniel Berglind, PhD<sup>2,5,6</sup> (ORCID 0000-0003-0616-7779), Mattias Brunström, MD, PhD<sup>7</sup> (ORCID 0000-0002-7054-0905), Angel Herraiz-Adillo, PhD<sup>8</sup> (ORCID 0000-0002-2691-0315), Pontus Henriksson, PhD<sup>8</sup> (ORCID 0000-0003-2482-7048), Martin Neovius, PhD<sup>9</sup> (ORCID 0000-0003-2300-3055), Francisco B. Ortega, PhD<sup>10,11</sup> (ORCID 0000-0003-2001-1121), Anna Nordström, MD, PhD<sup>12,13</sup> (ORCID 0000-0003-3534-456X), Peter Nordström, MD, PhD<sup>1</sup> (ORCID 0000-0003-2924-508X)

#### Affiliations:

<sup>1</sup>Department of Public Health and Caring Sciences, Clinical Geriatrics, Uppsala University, Uppsala, Sweden. <sup>2</sup>Centre for Epidemiology and Community Medicine, Region Stockholm, Stockholm, Sweden. <sup>3</sup>Department of Biomedicine, Aarhus University, Aarhus, Denmark. <sup>4</sup>Institute of Environmental Medicine, Karolinska Institutet, Stockholm, Sweden. <sup>5</sup>Department of Global Public Health, Karolinska Institutet, Stockholm, Sweden. <sup>6</sup>Center for Wellbeing, Welfare and Happiness, Stockholm School of Economics, Stockholm, Sweden. <sup>7</sup>Department of Public Health and Clinical Medicine, Umeå University, Umeå, Sweden. <sup>8</sup>Department of Health, Medicine and Caring Sciences, Linköping University, Linköping, Sweden. <sup>9</sup>Department of Medicine, Clinical Epidemiology Division, Karolinska Institutet, Stockholm, Sweden. <sup>10</sup>Department of Physical Education and Sports, Faculty of Sport Sciences, Sport and Health University Research Institute (iMUDS), University of Granada; CIBEROBN, ISCIII, Granada, Andalucía, Spain. <sup>11</sup>Faculty of Sport and Health Sciences, University of Jyväskylä, Jyväskylä, Finland. <sup>12</sup>Department of Medical Sciences, Rehabilitation Medicine, Uppsala University, Uppsala, Sweden. <sup>13</sup>School of Sport Sciences, UiT, The Arctic University of Norway, Tromsø, Norway

#### Correspondence:

Marcel Ballin ([marcel.ballin@uu.se](mailto:marcel.ballin@uu.se)). Department of Public Health and Caring Sciences, Clinical Geriatrics, Uppsala University, Husargatan 3 BMC, SE 75122, Uppsala, Sweden.

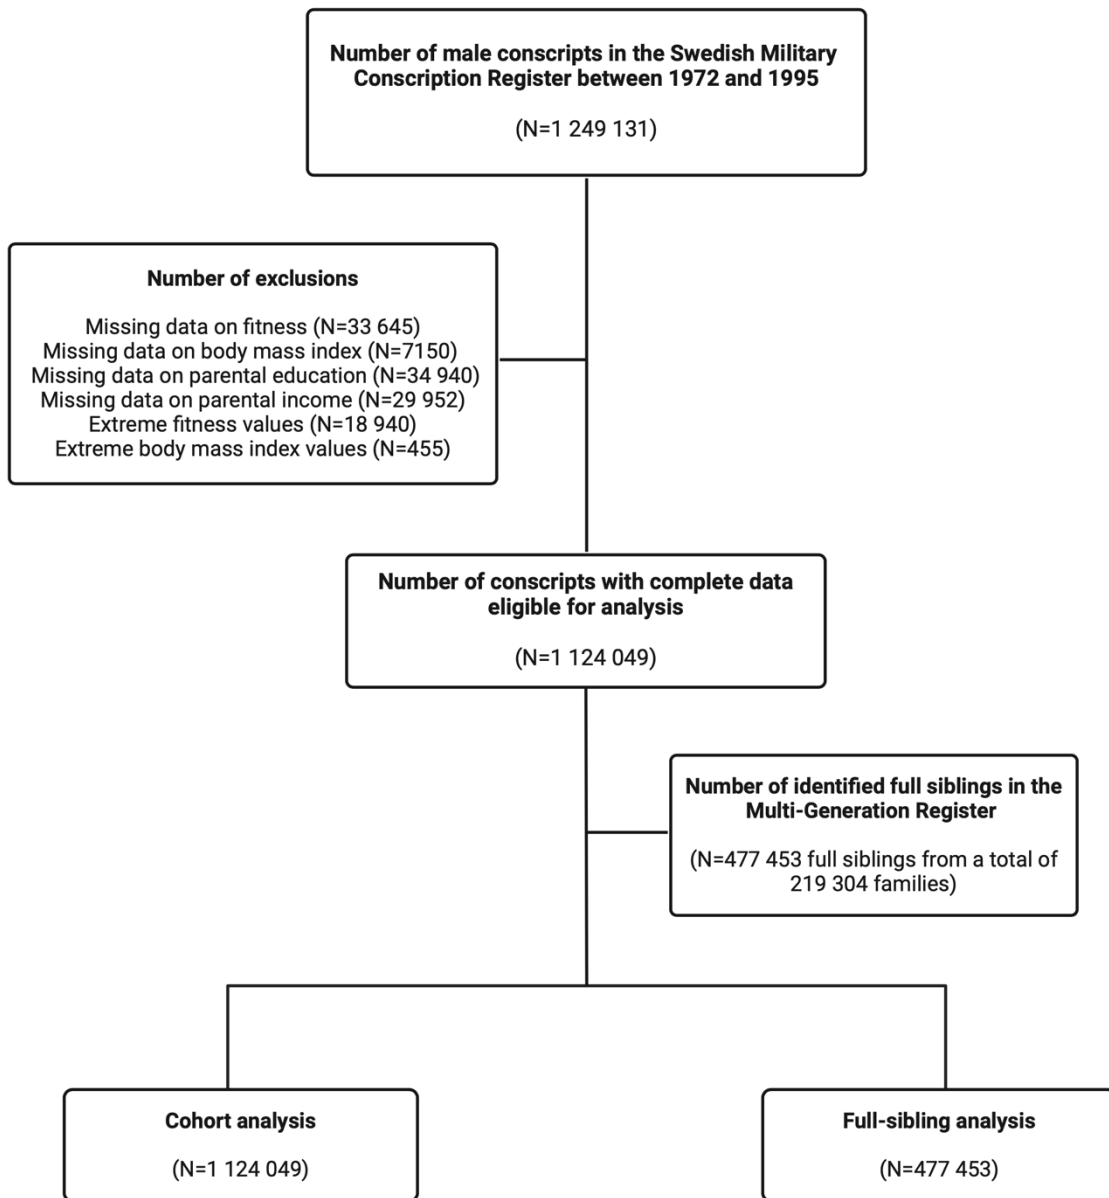

**Supplemental Figure 1. Participant flow chart.** Created using BioRender.com

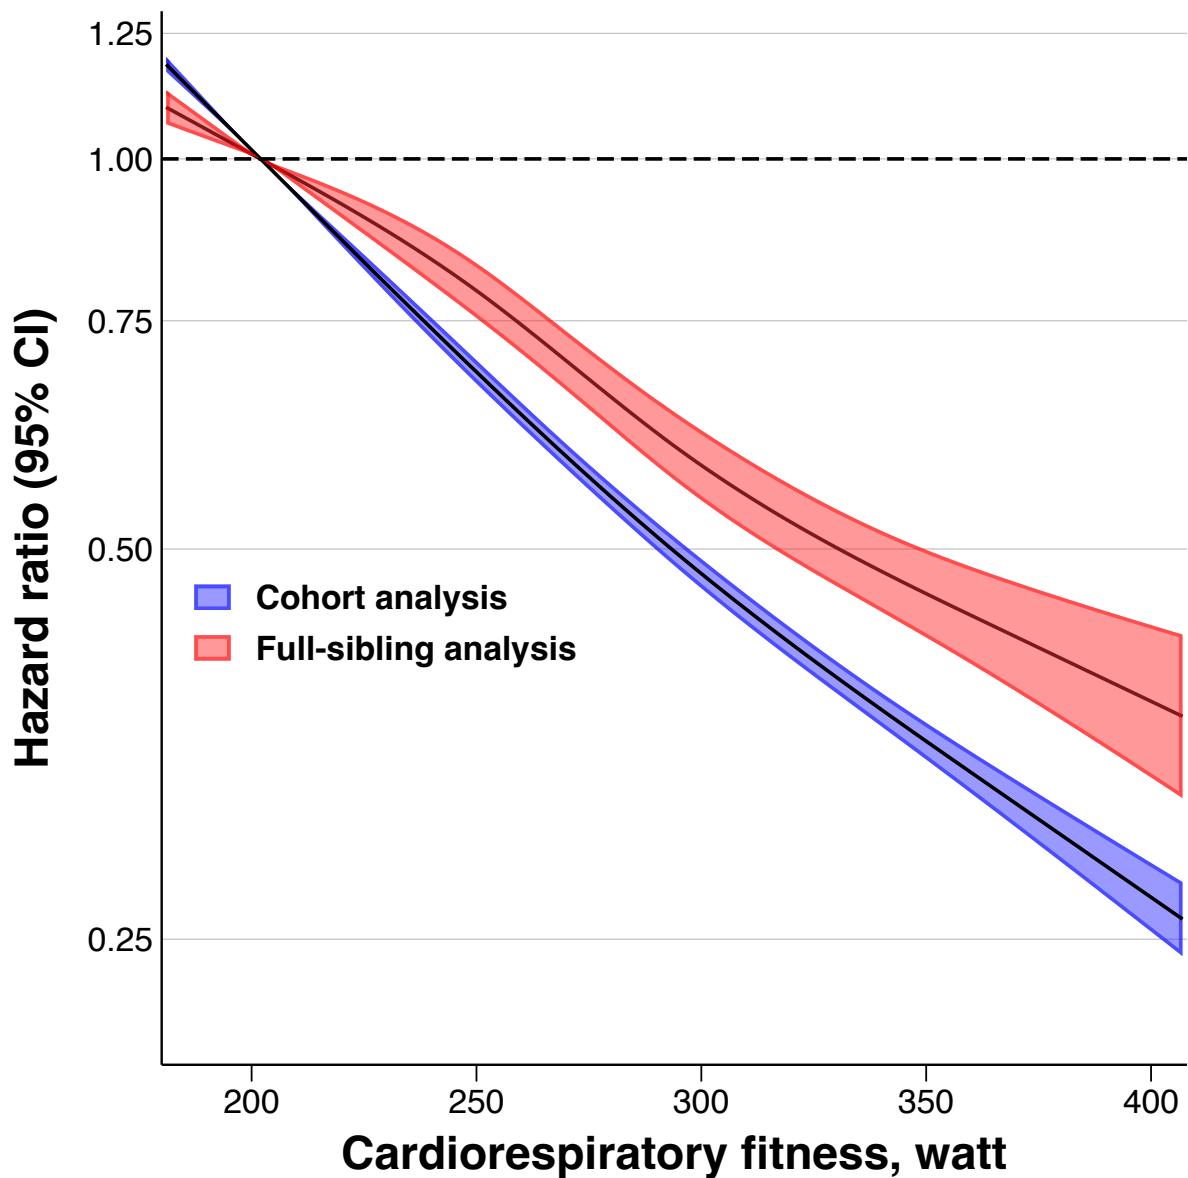

**Supplemental Figure 2. Hazard ratios for type 2 diabetes diagnosis only (thus not considering dispensation of antidiabetic medication as in the main analysis) across restricted cubic splines of cardiorespiratory fitness in cohort and full-sibling analysis.** Estimates were obtained using flexible parametric survival models, extended to a marginalized between-within model in the sibling analysis, with knots placed at the 5<sup>th</sup>, 35<sup>th</sup>, 65<sup>th</sup>, and 95<sup>th</sup> percentile, and using age as the underlying time scale. The referent was set to the median value of the bottom decile (202  $W_{max}$ ). The models were adjusted for age at conscription, year of conscription, body mass index, parental education, and parental income. For graphical purposes, the x-axis was limited to span from the first to the 99th percentile of the exposure distribution.

**Supplemental Table 1. Baseline characteristics by deciles of cardiorespiratory fitness in the total cohort and in the full-sibling cohort.**

| <b>Total cohort</b>                                 |                                 |                                 |                                 |                                 |                                 |                                 |                                 |                                 |                                 |                                  |
|-----------------------------------------------------|---------------------------------|---------------------------------|---------------------------------|---------------------------------|---------------------------------|---------------------------------|---------------------------------|---------------------------------|---------------------------------|----------------------------------|
| <b>Variables</b>                                    | <b>Decile 1<br/>(N=120 001)</b> | <b>Decile 2<br/>(N=105 379)</b> | <b>Decile 3<br/>(N=125 892)</b> | <b>Decile 4<br/>(N=101 028)</b> | <b>Decile 5<br/>(N=116 091)</b> | <b>Decile 6<br/>(N=106 283)</b> | <b>Decile 7<br/>(N=113 794)</b> | <b>Decile 8<br/>(N=111 840)</b> | <b>Decile 9<br/>(N=111 889)</b> | <b>Decile 10<br/>(N=111 852)</b> |
| <b>Birth year, median (IQR)</b>                     | 1959 (1950-1977)                | 1960 (1950-1977)                | 1962 (1950-1977)                | 1964 (1950-1977)                | 1966 (1950-1977)                | 1966 (1950-1977)                | 1969 (1951-1977)                | 1969 (1951-1977)                | 1971 (1951-1977)                | 1971 (1952-1977)                 |
| <b>Age at conscription, mean (SD)</b>               | 18.4 (0.9)                      | 18.4 (0.8)                      | 18.3 (0.8)                      | 18.3 (0.7)                      | 18.3 (0.7)                      | 18.3 (0.6)                      | 18.3 (0.6)                      | 18.3 (0.6)                      | 18.3 (0.5)                      | 18.3 (0.5)                       |
| <b>Body mass index, kg/m<sup>2</sup>, mean (SD)</b> | 20.2 (2.8)                      | 21.0 (2.7)                      | 21.4 (2.8)                      | 21.6 (2.9)                      | 21.8 (2.8)                      | 21.9 (2.7)                      | 22.1 (2.8)                      | 22.4 (2.7)                      | 22.3 (2.5)                      | 23.1 (2.6)                       |
| <b>Body mass index categories, n (%)</b>            |                                 |                                 |                                 |                                 |                                 |                                 |                                 |                                 |                                 |                                  |
| Underweight (<18.5 kg/m <sup>2</sup> )              | 30 428 (25.4)                   | 14 233 (13.5)                   | 12 332 (9.8)                    | 8486 (8.4)                      | 7540 (6.5)                      | 5690 (5.4)                      | 4560 (4.0)                      | 2782 (2.5)                      | 2300 (2.1)                      | 615 (0.6)                        |
| Normal weight (18.5-24.9 kg/m <sup>2</sup> )        | 82 973 (69.1)                   | 83 468 (79.2)                   | 101 670 (80.8)                  | 82 565 (81.7)                   | 96 076 (82.8)                   | 88 964 (83.7)                   | 95 128 (83.6)                   | 94 443 (84.4)                   | 96 551 (86.3)                   | 91 748 (82.0)                    |
| Overweight (25.0-29.9 kg/m <sup>2</sup> )           | 5149 (4.3)                      | 6319 (6.0)                      | 9832 (7.8)                      | 8182 (8.1)                      | 10 399 (9.0)                    | 9848 (9.3)                      | 11 708 (10.3)                   | 12 629 (11.3)                   | 11 312 (10.1)                   | 16 889 (15.1)                    |
| Obesity (≥30.0 kg/m <sup>2</sup> )                  | 1451 (1.2)                      | 1359 (1.3)                      | 2058 (1.6)                      | 1795 (1.8)                      | 2076 (1.8)                      | 1781 (1.7)                      | 2398 (2.1)                      | 1986 (1.8)                      | 1728 (1.5)                      | 2600 (2.3)                       |
| <b>Parental level of education, n (%)</b>           |                                 |                                 |                                 |                                 |                                 |                                 |                                 |                                 |                                 |                                  |
| Compulsory school ≤9 years                          | 51 207 (42.7)                   | 42 796 (40.6)                   | 46 625 (37.0)                   | 32 667 (32.3)                   | 34 298 (29.5)                   | 28 527 (26.8)                   | 25 999 (22.9)                   | 22 642 (20.2)                   | 18 587 (16.6)                   | 15 894 (14.2)                    |
| Secondary education                                 | 50 620 (42.2)                   | 44 854 (42.6)                   | 54 941 (43.6)                   | 45 737 (45.3)                   | 53 143 (45.8)                   | 49 235 (46.3)                   | 53 597 (47.1)                   | 51 869 (46.4)                   | 51 750 (46.3)                   | 49 764 (44.5)                    |
| Post-secondary education <3 years                   | 8336 (7.0)                      | 7932 (7.5)                      | 10 647 (8.5)                    | 9831 (9.7)                      | 12 291 (10.6)                   | 11 836 (11.1)                   | 14 190 (12.5)                   | 14 934 (13.4)                   | 16 394 (14.7)                   | 17 366 (15.5)                    |
| Post-secondary education ≥3 years                   | 9838 (8.2)                      | 9797 (9.3)                      | 13 679 (10.9)                   | 12 793 (12.7)                   | 16 359 (14.1)                   | 16 685 (15.7)                   | 20 008 (17.6)                   | 22 395 (20.0)                   | 25 158 (22.5)                   | 28 828 (25.8)                    |
| <b>Parental highest income, n (%)</b>               |                                 |                                 |                                 |                                 |                                 |                                 |                                 |                                 |                                 |                                  |
| Category 1 (low income)                             | 8341 (7.0)                      | 6828 (6.5)                      | 7434 (5.9)                      | 5615 (5.6)                      | 5911 (5.1)                      | 5058 (4.8)                      | 5009 (4.4)                      | 4127 (3.7)                      | 3635 (3.3)                      | 3097 (2.8)                       |
| Category 2                                          | 14 583 (12.2)                   | 11 914 (11.3)                   | 13 719 (10.9)                   | 10 537 (10.4)                   | 11 770 (10.1)                   | 10 081 (9.5)                    | 10 425 (9.2)                    | 9344 (8.4)                      | 8928 (8.0)                      | 7534 (6.7)                       |
| Category 3                                          | 30 064 (25.1)                   | 25 264 (24.0)                   | 28 880 (22.9)                   | 22 528 (22.3)                   | 25 028 (21.6)                   | 22 293 (21.0)                   | 23 274 (20.5)                   | 21 200 (19.0)                   | 20 635 (18.4)                   | 18 787 (16.8)                    |
| Category 4                                          | 36 612 (30.5)                   | 31 776 (30.1)                   | 38 634 (30.7)                   | 30 654 (30.3)                   | 35 124 (30.3)                   | 32 279 (30.4)                   | 34 044 (29.9)                   | 33 159 (29.7)                   | 33 252 (29.7)                   | 32 921 (29.4)                    |
| Category 5 (high income)                            | 30 401 (25.3)                   | 29 597 (28.1)                   | 37 225 (29.6)                   | 31 694 (31.4)                   | 38 258 (33.0)                   | 36 572 (34.4)                   | 41 053 (36.1)                   | 44 010 (39.4)                   | 45 438 (40.6)                   | 49 513 (44.3)                    |
| <b>Full-sibling cohort</b>                          |                                 |                                 |                                 |                                 |                                 |                                 |                                 |                                 |                                 |                                  |
| <b>Variables</b>                                    | <b>Decile 1<br/>(N=49 673)</b>  | <b>Decile 2<br/>(N=44 708)</b>  | <b>Decile 3<br/>(N=53 610)</b>  | <b>Decile 4<br/>(N=43 260)</b>  | <b>Decile 5<br/>(N=49 313)</b>  | <b>Decile 6<br/>(N=45 881)</b>  | <b>Decile 7<br/>(N=48 197)</b>  | <b>Decile 8<br/>(N=48 071)</b>  | <b>Decile 9<br/>(N=46 983)</b>  | <b>Decile 10<br/>(N=47 757)</b>  |
| <b>Birth year, median (IQR)</b>                     | 1961 (1950-1977)                | 1961 (1950-1977)                | 1962 (1950-1977)                | 1964 (1950-1977)                | 1965 (1951-1977)                | 1966 (1950-1977)                | 1968 (1952-1977)                | 1968 (1952-1977)                | 1970 (1952-1977)                | 1970 (1953-1977)                 |
| <b>Age at conscription, mean (SD)</b>               | 18.4 (0.9)                      | 18.3 (0.8)                      | 18.3 (0.8)                      | 18.3 (0.7)                      | 18.3 (0.7)                      | 18.3 (0.6)                      | 18.3 (0.6)                      | 18.2 (0.5)                      | 18.3 (0.5)                      | 18.3 (0.5)                       |
| <b>Body mass index, kg/m<sup>2</sup>, mean (SD)</b> | 20.2 (2.7)                      | 20.9 (2.7)                      | 21.4 (2.8)                      | 21.5 (2.8)                      | 21.7 (2.7)                      | 21.8 (2.7)                      | 22.1 (2.8)                      | 22.3 (2.6)                      | 22.2 (2.5)                      | 23.0 (2.6)                       |
| <b>Body mass index categories, n (%)</b>            |                                 |                                 |                                 |                                 |                                 |                                 |                                 |                                 |                                 |                                  |
| Underweight (<18.5 kg/m <sup>2</sup> )              | 12 743 (25.7)                   | 6189 (13.8)                     | 5242 (9.8)                      | 3627 (8.4)                      | 3179 (6.5)                      | 2463 (5.4)                      | 1929 (4.0)                      | 1213 (2.5)                      | 1015 (2.2)                      | 284 (0.6)                        |
| Normal weight (18.5-24.9 kg/m <sup>2</sup> )        | 34 350 (69.2)                   | 35 427 (79.2)                   | 43 480 (81.1)                   | 35 554 (82.2)                   | 41 107 (83.4)                   | 38 664 (84.3)                   | 40 617 (84.3)                   | 41 035 (85.4)                   | 40 811 (86.9)                   | 39 766 (83.3)                    |
| Overweight (25.0-29.9 kg/m <sup>2</sup> )           | 2051 (4.1)                      | 2550 (5.7)                      | 4062 (7.6)                      | 3333 (7.7)                      | 4211 (8.5)                      | 4043 (8.8)                      | 4736 (9.8)                      | 5044 (10.5)                     | 4496 (10.0)                     | 6722 (14.1)                      |
| Obesity (≥30.0 kg/m <sup>2</sup> )                  | 529 (1.1)                       | 542 (1.2)                       | 826 (1.5)                       | 746 (1.7)                       | 816 (1.7)                       | 711 (1.6)                       | 915 (1.9)                       | 779 (1.5)                       | 661 (1.4)                       | 985 (2.1)                        |
| <b>Parental level of education, n (%)</b>           |                                 |                                 |                                 |                                 |                                 |                                 |                                 |                                 |                                 |                                  |
| Compulsory school ≤9 years                          | 21 446 (43.2)                   | 18 112 (40.5)                   | 19 901 (37.1)                   | 14 344 (33.2)                   | 15 096 (30.6)                   | 12 831 (28.0)                   | 11 617 (24.1)                   | 10 350 (21.5)                   | 8370 (17.8)                     | 7179 (15.0)                      |
| Secondary education                                 | 20 714 (41.7)                   | 18 879 (42.2)                   | 23 197 (43.3)                   | 19 207 (44.4)                   | 22 077 (44.8)                   | 20 697 (45.1)                   | 22 160 (46.0)                   | 21 548 (44.8)                   | 21 195 (45.1)                   | 20 572 (43.1)                    |
| Post-secondary education <3 years                   | 3327 (6.7)                      | 3290 (7.4)                      | 4331 (8.1)                      | 4010 (9.3)                      | 4993 (10.1)                     | 4902 (10.7)                     | 5694 (11.8)                     | 6076 (12.6)                     | 6545 (13.9)                     | 7042 (14.8)                      |
| Post-secondary education ≥3 years                   | 4186 (8.4)                      | 4427 (9.9)                      | 6181 (11.5)                     | 5699 (13.2)                     | 7147 (14.5)                     | 7451 (16.2)                     | 8726 (18.1)                     | 10 097 (21.0)                   | 10 873 (23.1)                   | 12 964 (27.2)                    |
| <b>Parental highest income, n (%)</b>               |                                 |                                 |                                 |                                 |                                 |                                 |                                 |                                 |                                 |                                  |
| Category 1 (low income)                             | 2759 (5.6)                      | 2333 (5.2)                      | 2469 (4.6)                      | 1940 (4.5)                      | 2008 (4.1)                      | 1790 (3.9)                      | 1767 (3.7)                      | 1481 (3.1)                      | 1264 (2.7)                      | 1107 (2.3)                       |
| Category 2                                          | 5579 (11.2)                     | 4619 (10.3)                     | 5358 (10.0)                     | 4103 (9.5)                      | 4494 (9.1)                      | 3936 (8.6)                      | 3995 (8.3)                      | 3552 (7.4)                      | 3303 (7.0)                      | 2881 (6.0)                       |
| Category 3                                          | 12 839 (25.9)                   | 10 890 (24.4)                   | 12 379 (23.1)                   | 9761 (22.6)                     | 10 757 (21.8)                   | 9522 (20.8)                     | 9838 (20.4)                     | 8852 (18.4)                     | 8444 (18.0)                     | 7868 (16.5)                      |
| Category 4                                          | 15 791 (31.8)                   | 13 803 (30.9)                   | 16 802 (31.3)                   | 13 356 (30.9)                   | 15 229 (30.9)                   | 14 200 (31.0)                   | 14 458 (30.0)                   | 14 321 (29.8)                   | 13 986 (29.8)                   | 13 789 (28.9)                    |
| Category 5 (high income)                            | 12 705 (25.6)                   | 13 063 (29.2)                   | 16 602 (31.0)                   | 14 100 (32.6)                   | 16 825 (34.1)                   | 16 433 (35.8)                   | 18 139 (37.6)                   | 19 865 (41.3)                   | 19 986 (42.5)                   | 22 112 (46.3)                    |

IQR = interquartile range. SD = standard deviation.

**Supplemental Table 2. Numbers censored due to death, emigration, and end of follow-up.**

|                                   | <b>Cohort analysis<br/>(N=1 124 049)</b> | <b>Full-sibling analysis<br/>(N=477 453)</b> |
|-----------------------------------|------------------------------------------|----------------------------------------------|
| <b>During the total follow-up</b> |                                          |                                              |
| Death                             | 56 009 (5.0)                             | 22 304 (4.7)                                 |
| Emigration                        | 71 656 (6.4)                             | 29 530 (6.2)                                 |
| End of follow-up, 31 Dec 2023     | 880 426 (78.3)                           | 377 530 (79.1)                               |
| <b>Before 1997</b>                |                                          |                                              |
| Death                             | 10 772 (1.0)                             | 4126 (0.9)                                   |
| Emigration                        | 20 775 (1.9)                             | 9077 (1.9)                                   |

Number of events and numbers censored are shown as n (%).

**Supplemental Table 3. Population-attributable fraction of type 2 diabetes at 65 years of age by cardiorespiratory fitness in cohort and full-sibling analysis, when considering a minor, (shifting those in decile 1 to decile 2), moderate (shifting those below deciles 5 to decile 5), or an extreme intervention (shifting everyone to decile 10).**

|                                  | <b>Cohort analysis<br/>(N=1 124 049)</b> | <b>Full-sibling analysis<br/>(N=477 453)</b> |
|----------------------------------|------------------------------------------|----------------------------------------------|
| <b>Hypothetical intervention</b> | <b>PAF, % (95% CI)</b>                   | <b>PAF, % (95% CI)</b>                       |
| <b>Minor</b>                     | 7.2 (6.4 to 8.0)                         | 4.6 (2.6 to 6.5)                             |
| <b>Moderate</b>                  | 15.4 (14.2 to 16.5)                      | 10.8 (8.1 to 13.4)                           |
| <b>Extreme</b>                   | 35.6 (34.1 to 37.0)                      | 24.3 (20.5 to 28.0)                          |

CI = confidence interval. PAF = population-attributable fraction.

The models were adjusted for age at conscription, year of conscription, body mass index, parental education, and parental income.

**Supplemental Table 4. Hazard ratios for type 2 diabetes by deciles of cardiorespiratory fitness in cohort and full-sibling analysis stratified by overweight status.**

|                                           | <b>Cohort analysis in participants without overweight (N=1 002 552)</b> | <b>Cohort analysis in participants with overweight (N=121 497)</b> | <b>Full-sibling analysis in participants without overweight (N=428 695)</b> | <b>Full-sibling analysis in participants with overweight (N=48 758)</b> |
|-------------------------------------------|-------------------------------------------------------------------------|--------------------------------------------------------------------|-----------------------------------------------------------------------------|-------------------------------------------------------------------------|
| <b>Cardiorespiratory fitness, deciles</b> | <b>HR (95% CI)</b>                                                      | <b>HR (95% CI)</b>                                                 | <b>HR (95% CI)</b>                                                          | <b>HR (95% CI)</b>                                                      |
| D1                                        | Ref.                                                                    | Ref.                                                               | Ref.                                                                        | Ref.                                                                    |
| D2                                        | 0.92 (0.90 to 0.94)                                                     | 0.98 (0.92 to 1.03)                                                | 0.95 (0.91 to 1.01)                                                         | 1.02 (0.91 to 1.15)                                                     |
| D3                                        | 0.91 (0.89 to 0.93)                                                     | 0.88 (0.83 to 0.93)                                                | 0.96 (0.90 to 1.01)                                                         | 0.97 (0.87 to 1.09)                                                     |
| D4                                        | 0.86 (0.84 to 0.88)                                                     | 0.85 (0.80 to 0.90)                                                | 0.95 (0.89 to 1.00)                                                         | 0.92 (0.81 to 1.04)                                                     |
| D5                                        | 0.80 (0.78 to 0.82)                                                     | 0.80 (0.76 to 0.85)                                                | 0.87 (0.82 to 0.92)                                                         | 0.92 (0.81 to 1.03)                                                     |
| D6                                        | 0.75 (0.73 to 0.77)                                                     | 0.74 (0.70 to 0.79)                                                | 0.85 (0.80 to 0.90)                                                         | 0.83 (0.73 to 0.94)                                                     |
| D7                                        | 0.72 (0.70 to 0.75)                                                     | 0.70 (0.66 to 0.74)                                                | 0.78 (0.73 to 0.84)                                                         | 0.81 (0.72 to 0.93)                                                     |
| D8                                        | 0.66 (0.64 to 0.68)                                                     | 0.62 (0.59 to 0.66)                                                | 0.73 (0.68 to 0.79)                                                         | 0.74 (0.65 to 0.84)                                                     |
| D9                                        | 0.59 (0.57 to 0.61)                                                     | 0.58 (0.55 to 0.62)                                                | 0.71 (0.66 to 0.77)                                                         | 0.74 (0.64 to 0.85)                                                     |
| D10                                       | 0.53 (0.50 to 0.54)                                                     | 0.50 (0.47 to 0.54)                                                | 0.65 (0.60 to 0.71)                                                         | 0.67 (0.58 to 0.77)                                                     |

CI = confidence interval. D = decile. HR = hazard ratio.

The models were adjusted for age at conscription, year of conscription, parental education, and parental income.

**Supplemental Table 5. Hazard ratios for type 2 diabetes by deciles of cardiorespiratory fitness in cohort and full-sibling analysis, with and without adjusting for handgrip strength.**

|                                               | <b>Cohort analysis<br/>without adjustment<br/>for handgrip strength<br/>(N=1 124 049)</b> | <b>Cohort analysis with<br/>adjustment for<br/>handgrip strength<br/>(N=1 095 378)</b> | <b>Full-sibling analysis<br/>without adjustment<br/>for handgrip strength<br/>(N=477 453)</b> | <b>Full-sibling analysis<br/>with adjustment for<br/>handgrip strength<br/>(N=469 718)</b> |
|-----------------------------------------------|-------------------------------------------------------------------------------------------|----------------------------------------------------------------------------------------|-----------------------------------------------------------------------------------------------|--------------------------------------------------------------------------------------------|
| <b>Cardiorespiratory fitness,<br/>deciles</b> | <b>HR (95% CI)</b>                                                                        | <b>HR (95% CI)</b>                                                                     | <b>HR (95% CI)</b>                                                                            | <b>HR (95% CI)</b>                                                                         |
| D1                                            | Ref.                                                                                      | Ref.                                                                                   | Ref.                                                                                          | Ref.                                                                                       |
| D2                                            | 0.83 (0.81 to 0.85)                                                                       | 0.85 (0.83 to 0.87)                                                                    | 0.89 (0.85 to 0.94)                                                                           | 0.91 (0.86 to 0.95)                                                                        |
| D3                                            | 0.76 (0.74 to 0.78)                                                                       | 0.79 (0.77 to 0.80)                                                                    | 0.85 (0.81 to 0.89)                                                                           | 0.88 (0.84 to 0.92)                                                                        |
| D4                                            | 0.70 (0.68 to 0.72)                                                                       | 0.73 (0.71 to 0.75)                                                                    | 0.82 (0.78 to 0.86)                                                                           | 0.85 (0.80 to 0.90)                                                                        |
| D5                                            | 0.64 (0.62 to 0.65)                                                                       | 0.67 (0.65 to 0.69)                                                                    | 0.76 (0.72 to 0.80)                                                                           | 0.79 (0.75 to 0.84)                                                                        |
| D6                                            | 0.59 (0.58 to 0.61)                                                                       | 0.62 (0.61 to 0.64)                                                                    | 0.71 (0.67 to 0.76)                                                                           | 0.76 (0.71 to 0.80)                                                                        |
| D7                                            | 0.55 (0.54 to 0.57)                                                                       | 0.59 (0.57 to 0.60)                                                                    | 0.66 (0.62 to 0.70)                                                                           | 0.71 (0.67 to 0.76)                                                                        |
| D8                                            | 0.49 (0.48 to 0.50)                                                                       | 0.53 (0.51 to 0.54)                                                                    | 0.60 (0.57 to 0.64)                                                                           | 0.66 (0.62 to 0.70)                                                                        |
| D9                                            | 0.44 (0.42 to 0.45)                                                                       | 0.47 (0.46 to 0.49)                                                                    | 0.58 (0.54 to 0.62)                                                                           | 0.64 (0.59 to 0.68)                                                                        |
| D10                                           | 0.38 (0.36 to 0.39)                                                                       | 0.42 (0.40 to 0.43)                                                                    | 0.53 (0.49 to 0.57)                                                                           | 0.60 (0.56 to 0.64)                                                                        |

CI = confidence interval. D = decile. HR = hazard ratio.

The models were adjusted for age at conscription, year of conscription, body mass index, parental education, parental income, and handgrip strength as indicated.



**Supplemental Table 6. Hazard ratios for type 2 diabetes by deciles of cardiorespiratory fitness in cohort and full-sibling analysis, with and without adjusting for knee extension strength.**

| Cardiorespiratory fitness, deciles | Cohort analysis without adjustment for knee extension strength (N=1 124 049) | Cohort analysis with adjustment for knee extension strength (N=1 095 343) | Full-sibling analysis without adjustment for knee extension strength (N=477 453) | Full-sibling analysis with adjustment for knee extension strength (N=469 686) |
|------------------------------------|------------------------------------------------------------------------------|---------------------------------------------------------------------------|----------------------------------------------------------------------------------|-------------------------------------------------------------------------------|
|                                    | HR (95% CI)                                                                  | HR (95% CI)                                                               | HR (95% CI)                                                                      | HR (95% CI)                                                                   |
| D1                                 | Ref.                                                                         | Ref.                                                                      | Ref.                                                                             | Ref.                                                                          |
| D2                                 | 0.83 (0.81 to 0.85)                                                          | 0.85 (0.83 to 0.86)                                                       | 0.89 (0.85 to 0.94)                                                              | 0.91 (0.87 to 0.95)                                                           |
| D3                                 | 0.76 (0.74 to 0.78)                                                          | 0.79 (0.77 to 0.80)                                                       | 0.85 (0.81 to 0.89)                                                              | 0.88 (0.84 to 0.92)                                                           |
| D4                                 | 0.70 (0.68 to 0.72)                                                          | 0.73 (0.71 to 0.75)                                                       | 0.82 (0.78 to 0.86)                                                              | 0.85 (0.81 to 0.90)                                                           |
| D5                                 | 0.64 (0.62 to 0.65)                                                          | 0.67 (0.65 to 0.69)                                                       | 0.76 (0.72 to 0.80)                                                              | 0.80 (0.76 to 0.84)                                                           |
| D6                                 | 0.59 (0.58 to 0.61)                                                          | 0.63 (0.61 to 0.64)                                                       | 0.71 (0.67 to 0.76)                                                              | 0.76 (0.72 to 0.81)                                                           |
| D7                                 | 0.55 (0.54 to 0.57)                                                          | 0.59 (0.57 to 0.61)                                                       | 0.66 (0.62 to 0.70)                                                              | 0.72 (0.68 to 0.76)                                                           |
| D8                                 | 0.49 (0.48 to 0.50)                                                          | 0.53 (0.51 to 0.54)                                                       | 0.60 (0.57 to 0.64)                                                              | 0.67 (0.63 to 0.71)                                                           |
| D9                                 | 0.44 (0.42 to 0.45)                                                          | 0.48 (0.46 to 0.49)                                                       | 0.58 (0.54 to 0.62)                                                              | 0.65 (0.61 to 0.69)                                                           |
| D10                                | 0.38 (0.36 to 0.39)                                                          | 0.42 (0.40 to 0.43)                                                       | 0.53 (0.49 to 0.57)                                                              | 0.61 (0.57 to 0.67)                                                           |

CI = confidence interval. D = decile. HR = hazard ratio.

The models were adjusted for age at conscription, year of conscription, body mass index, parental education, parental income, and knee extension strength as indicated.

**Supplemental Table 7. Hazard ratios for type 2 diabetes by deciles of cardiorespiratory fitness in cohort and full-sibling analysis, with and without adjusting for body height.**

|                                               | <b>Cohort analysis<br/>without adjustment<br/>for body height<br/>(N=1 124 049)</b> | <b>Cohort analysis with<br/>adjustment for body<br/>height<br/>(N=1 124 049)</b> | <b>Full-sibling analysis<br/>without adjustment<br/>for body height<br/>(N=477 453)</b> | <b>Full-sibling analysis<br/>with adjustment for<br/>body height<br/>(N=477 453)</b> |
|-----------------------------------------------|-------------------------------------------------------------------------------------|----------------------------------------------------------------------------------|-----------------------------------------------------------------------------------------|--------------------------------------------------------------------------------------|
| <b>Cardiorespiratory fitness,<br/>deciles</b> | <b>HR (95% CI)</b>                                                                  | <b>HR (95% CI)</b>                                                               | <b>HR (95% CI)</b>                                                                      | <b>HR (95% CI)</b>                                                                   |
| D1                                            | Ref.                                                                                | Ref.                                                                             | Ref.                                                                                    | Ref.                                                                                 |
| D2                                            | 0.83 (0.81 to 0.85)                                                                 | 0.83 (0.81 to 0.85)                                                              | 0.89 (0.85 to 0.94)                                                                     | 0.89 (0.85 to 0.94)                                                                  |
| D3                                            | 0.76 (0.74 to 0.78)                                                                 | 0.76 (0.74 to 0.77)                                                              | 0.85 (0.81 to 0.89)                                                                     | 0.85 (0.82 to 0.89)                                                                  |
| D4                                            | 0.70 (0.68 to 0.72)                                                                 | 0.70 (0.68 to 0.72)                                                              | 0.82 (0.78 to 0.86)                                                                     | 0.82 (0.78 to 0.87)                                                                  |
| D5                                            | 0.64 (0.62 to 0.65)                                                                 | 0.63 (0.62 to 0.65)                                                              | 0.76 (0.72 to 0.80)                                                                     | 0.76 (0.72 to 0.80)                                                                  |
| D6                                            | 0.59 (0.58 to 0.61)                                                                 | 0.59 (0.57 to 0.60)                                                              | 0.71 (0.67 to 0.76)                                                                     | 0.72 (0.68 to 0.77)                                                                  |
| D7                                            | 0.55 (0.54 to 0.57)                                                                 | 0.55 (0.54 to 0.56)                                                              | 0.66 (0.62 to 0.70)                                                                     | 0.67 (0.64 to 0.72)                                                                  |
| D8                                            | 0.49 (0.48 to 0.50)                                                                 | 0.49 (0.47 to 0.50)                                                              | 0.60 (0.57 to 0.64)                                                                     | 0.62 (0.58 to 0.66)                                                                  |
| D9                                            | 0.44 (0.42 to 0.45)                                                                 | 0.43 (0.42 to 0.45)                                                              | 0.58 (0.54 to 0.62)                                                                     | 0.60 (0.56 to 0.64)                                                                  |
| D10                                           | 0.38 (0.36 to 0.39)                                                                 | 0.37 (0.36 to 0.39)                                                              | 0.53 (0.49 to 0.57)                                                                     | 0.55 (0.51 to 0.59)                                                                  |

CI = confidence interval. D = decile. HR = hazard ratio.

The models were adjusted for age at conscription, year of conscription, body mass index, body height, parental education, parental income, and body height as indicated.

**Supplemental Table 8. Hazard ratios for type 2 diabetes by deciles of cardiorespiratory fitness expressed as  $W_{max}$ ,  $W_{max}/kg$ , or estimated  $VO_{2max}$  in cohort and full-sibling analysis.**

| Cardiorespiratory fitness, deciles          | $W_{max}$                     |                                   | $W_{max}/kg$                  |                                   | Estimated $VO_{2max}$         |                                   |
|---------------------------------------------|-------------------------------|-----------------------------------|-------------------------------|-----------------------------------|-------------------------------|-----------------------------------|
|                                             | Cohort analysis (N=1 124 049) | Full-sibling analysis (N=477 453) | Cohort analysis (N=1 124 049) | Full-sibling analysis (N=477 453) | Cohort analysis (N=1 124 049) | Full-sibling analysis (N=477 453) |
|                                             | HR (95% CI)                   | HR (95% CI)                       | HR (95% CI)                   | HR (95% CI)                       | HR (95% CI)                   | HR (95% CI)                       |
| D1                                          | Ref.                          | Ref.                              | Ref.                          | Ref.                              | Ref.                          | Ref.                              |
| D2                                          | 0.83 (0.81 to 0.85)           | 0.89 (0.85 to 0.94)               | 0.85 (0.84 to 0.87)           | 0.92 (0.88 to 0.97)               | 0.86 (0.84 to 0.87)           | 0.92 (0.88 to 0.97)               |
| D3                                          | 0.76 (0.74 to 0.78)           | 0.85 (0.81 to 0.89)               | 0.80 (0.78 to 0.82)           | 0.87 (0.82 to 0.91)               | 0.80 (0.78 to 0.82)           | 0.87 (0.82 to 0.91)               |
| D4                                          | 0.70 (0.68 to 0.72)           | 0.81 (0.77 to 0.86)               | 0.74 (0.73 to 0.76)           | 0.81 (0.77 to 0.86)               | 0.74 (0.73 to 0.76)           | 0.81 (0.77 to 0.86)               |
| D5                                          | 0.64 (0.62 to 0.65)           | 0.75 (0.71 to 0.79)               | 0.68 (0.67 to 0.70)           | 0.76 (0.72 to 0.80)               | 0.68 (0.67 to 0.70)           | 0.76 (0.72 to 0.80)               |
| D6                                          | 0.59 (0.58 to 0.61)           | 0.71 (0.67 to 0.75)               | 0.63 (0.61 to 0.65)           | 0.73 (0.68 to 0.77)               | 0.63 (0.61 to 0.65)           | 0.73 (0.68 to 0.77)               |
| D7                                          | 0.55 (0.54 to 0.57)           | 0.66 (0.62 to 0.70)               | 0.56 (0.55 to 0.58)           | 0.66 (0.62 to 0.70)               | 0.56 (0.55 to 0.58)           | 0.66 (0.62 to 0.70)               |
| D8                                          | 0.49 (0.48 to 0.50)           | 0.60 (0.57 to 0.64)               | 0.52 (0.50 to 0.53)           | 0.61 (0.57 to 0.65)               | 0.52 (0.50 to 0.53)           | 0.61 (0.57 to 0.65)               |
| D9                                          | 0.44 (0.42 to 0.45)           | 0.58 (0.54 to 0.62)               | 0.43 (0.42 to 0.45)           | 0.54 (0.50 to 0.58)               | 0.43 (0.42 to 0.45)           | 0.54 (0.50 to 0.58)               |
| D10                                         | 0.38 (0.36 to 0.39)           | 0.53 (0.50 to 0.57)               | 0.33 (0.32 to 0.35)           | 0.44 (0.40 to 0.48)               | 0.33 (0.32 to 0.35)           | 0.44 (0.40 to 0.48)               |
| <b>Cardiorespiratory fitness, per 1 MET</b> |                               |                                   |                               |                                   | 0.88 (0.87 to 0.89)           | 0.90 (0.90 to 0.91)               |

CI = confidence interval. D = decile. HR = hazard ratio. MET = metabolic equivalent of task, computed from dividing estimated  $VO_{2max}$  / 3.5.

The models were adjusted for age at conscription, year of conscription, body mass index, parental education, and parental income.

**Supplemental Table 9. Hazard ratios for type 2 diabetes by deciles of cardiorespiratory fitness in cohort analysis (as reported in the main article), in the sibling cohort using standard cohort analysis, and using full-sibling analysis (as reported in the main article)**

| Cardiorespiratory fitness, deciles | Cohort analysis as reported in the main article (N=1 124 049) | Standard analysis replicated in the full-sibling cohort (N=477 453) | Full-sibling analysis as reported in the main article (N=477 453) |
|------------------------------------|---------------------------------------------------------------|---------------------------------------------------------------------|-------------------------------------------------------------------|
|                                    | HR (95% CI)                                                   | HR (95% CI)                                                         | HR (95% CI)                                                       |
| D1                                 | Ref.                                                          | Ref.                                                                | Ref.                                                              |
| D2                                 | 0.83 (0.81 to 0.85)                                           | 0.83 (0.81 to 0.86)                                                 | 0.89 (0.85 to 0.94)                                               |
| D3                                 | 0.76 (0.74 to 0.78)                                           | 0.77 (0.74 to 0.79)                                                 | 0.85 (0.81 to 0.89)                                               |
| D4                                 | 0.70 (0.68 to 0.72)                                           | 0.69 (0.70 to 0.72)                                                 | 0.81 (0.77 to 0.86)                                               |
| D5                                 | 0.64 (0.62 to 0.65)                                           | 0.64 (0.62 to 0.66)                                                 | 0.75 (0.71 to 0.79)                                               |
| D6                                 | 0.59 (0.58 to 0.61)                                           | 0.60 (0.57 to 0.62)                                                 | 0.71 (0.67 to 0.75)                                               |
| D7                                 | 0.55 (0.54 to 0.57)                                           | 0.55 (0.53 to 0.57)                                                 | 0.66 (0.62 to 0.70)                                               |
| D8                                 | 0.49 (0.48 to 0.50)                                           | 0.48 (0.46 to 0.50)                                                 | 0.60 (0.57 to 0.64)                                               |
| D9                                 | 0.44 (0.42 to 0.45)                                           | 0.43 (0.41 to 0.45)                                                 | 0.58 (0.54 to 0.62)                                               |
| D10                                | 0.38 (0.36 to 0.39)                                           | 0.37 (0.35 to 0.39)                                                 | 0.53 (0.50 to 0.57)                                               |

CI = confidence interval. D = decile. HR = hazard ratio. The models were adjusted for age at conscription, year of conscription, body mass index, parental education, and parental income.

**Supplemental Table 10. Hazard ratios for type 2 by deciles of cardiorespiratory fitness in cohort and full-sibling analysis, restricted to those who conscribed year 1985 or later.**

| Cardiorespiratory fitness, deciles | Cohort analysis<br>(N=529 710) |                     | Full-sibling analysis<br>(N=161 663) |                     |
|------------------------------------|--------------------------------|---------------------|--------------------------------------|---------------------|
|                                    | Cases/N                        | HR (95% CI)         | Cases/N                              | HR (95% CI)         |
| D1                                 | 4084/57 822                    | Ref.                | 1129/17 246                          | Ref.                |
| D2                                 | 3734/52 741                    | 0.87 (0.83 to 0.91) | 1022/15 459                          | 0.95 (0.84 to 1.07) |
| D3                                 | 3303/48 703                    | 0.77 (0.74 to 0.81) | 909/14 309                           | 0.84 (0.74 to 0.95) |
| D4                                 | 3982/60 694                    | 0.70 (0.67 to 0.73) | 1118/18 140                          | 0.75 (0.67 to 0.85) |
| D5                                 | 3069/48 011                    | 0.64 (0.61 to 0.68) | 802/14 438                           | 0.67 (0.59 to 0.77) |
| D6                                 | 3085/50 629                    | 0.58 (0.55 to 0.61) | 860/15 507                           | 0.64 (0.56 to 0.73) |
| D7                                 | 3061/56 475                    | 0.55 (0.52 to 0.58) | 823/17 313                           | 0.59 (0.52 to 0.68) |
| D8                                 | 2368/49 147                    | 0.51 (0.48 to 0.53) | 703/15 302                           | 0.63 (0.55 to 0.73) |
| D9                                 | 2738 53 681                    | 0.46 (0.44 to 0.49) | 785/17 055                           | 0.59 (0.52 to 0.68) |
| D10                                | 2446/51 807                    | 0.39 (0.37 to 0.41) | 691/16 894                           | 0.48 (0.41 to 0.56) |

CI = confidence interval. D = decile. HR = hazard ratio. P.P = percentage point.

The models were adjusted for age at conscription, year of conscription, body mass index, parental education, and parental income.

**Supplemental Table 11. Hazard ratios for type 2 diabetes and differences in the standardized cumulative incidence at 65 years of age by deciles of cardiorespiratory fitness in cohort and full-sibling analysis, using the outcome definition that included only type 2 diabetes diagnosis.**

| Cardiorespiratory fitness, deciles | Cohort analysis (N=1 124 049) |                     |                                                                            | Full-sibling analysis (N=477 453) |                     |                                                                            |
|------------------------------------|-------------------------------|---------------------|----------------------------------------------------------------------------|-----------------------------------|---------------------|----------------------------------------------------------------------------|
|                                    | Cases/N                       | HR (95% CI)         | Difference in the standardized cumulative incidence at age 65, pp (95% CI) | Cases/N                           | HR (95% CI)         | Difference in the standardized cumulative incidence at age 65, pp (95% CI) |
| D1                                 | 9775/120 001                  | Ref.                | Ref.                                                                       | 3880/49 673                       | Ref.                | Ref.                                                                       |
| D2                                 | 8261/105 379                  | 0.82 (0.79 to 0.84) | -2.3 (-2.9 to -2.1)                                                        | 3357/44 708                       | 0.91 (0.85 to 0.97) | -1.0 (-1.6 to -0.3)                                                        |
| D3                                 | 9013/125 892                  | 0.72 (0.70 to 0.74) | -3.8 (-4.2 to -3.5)                                                        | 3745/53 610                       | 0.83 (0.78 to 0.89) | -1.8 (-2.5 to -1.2)                                                        |
| D4                                 | 6035/101 028                  | 0.66 (0.64 to 0.69) | -4.6 (-5.0 to -4.3)                                                        | 2469/43 260                       | 0.81 (0.75 to 0.87) | -2.0 (-2.8 to -1.3)                                                        |
| D5                                 | 6088/116 091                  | 0.60 (0.59 to 0.63) | -5.5 (-5.9 to -5.1)                                                        | 2536/49 313                       | 0.72 (0.67 to 0.78) | -3.0 (-3.8 to -2.3)                                                        |
| D6                                 | 4614/106 283                  | 0.53 (0.51 to 0.55) | -6.5 (-6.9 to -6.2)                                                        | 1980/45 881                       | 0.66 (0.61 to 0.72) | -3.7 (-4.5 to -3.0)                                                        |
| D7                                 | 4153/113 794                  | 0.49 (0.48 to 0.51) | -7.1 (-7.5 to -6.8)                                                        | 1707/48 197                       | 0.60 (0.55 to 0.65) | -4.5 (-5.2 to -3.7)                                                        |
| D8                                 | 3404/111 840                  | 0.43 (0.41 to 0.44) | -8.1 (-8.5 to -7.8)                                                        | 1391/48 071                       | 0.53 (0.48 to 0.58) | -5.2 (-6.0 to -4.5)                                                        |
| D9                                 | 2423 111 889                  | 0.37 (0.35 to 0.38) | -9.1 (-9.5 to -8.7)                                                        | 1003/46 983                       | 0.49 (0.45 to 0.55) | -5.6 (-6.4 to -4.9)                                                        |
| D10                                | 2193/111 852                  | 0.31 (0.29 to 0.32) | -10.0 (-10.4 to -9.6)                                                      | 893/47 757                        | 0.45 (0.40 to 0.50) | -6.2 (-7.0 to 5.4)                                                         |

CI = confidence interval. D = decile. HR = hazard ratio. pp = percentage point.

The models were adjusted for age at conscription, year of conscription, body mass index, parental education, and parental income.
